# Supplementary material for: A novel onco-miR-365 induces cutaneous squamous cell carcinoma
Source: PubMed Central journal article supplement — Carcinogenesis. 2013 Mar 20;34(7):1653–9. doi: 10.1093/carcin/bgt097 (PMC3697891; doi:10.1093/carcin/bgt097), 2013-03-20
Supplement: supp_bgt097_Supplemental_Figure_1A_C.pdf [file supp_bgt097_Supplemental_Figure_1A_C.pdf]

A

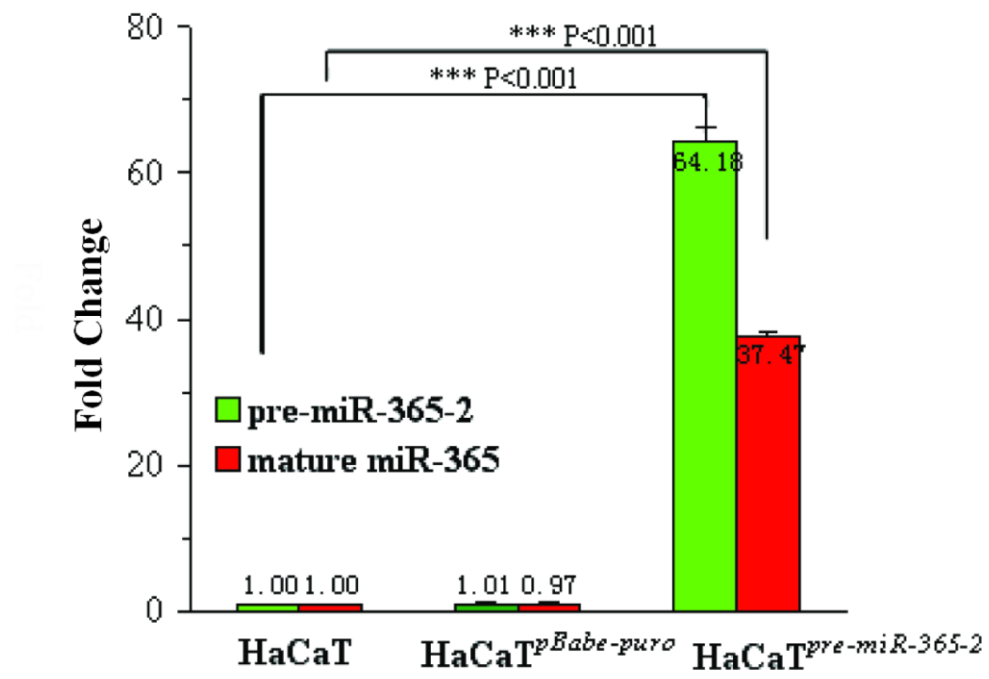

B

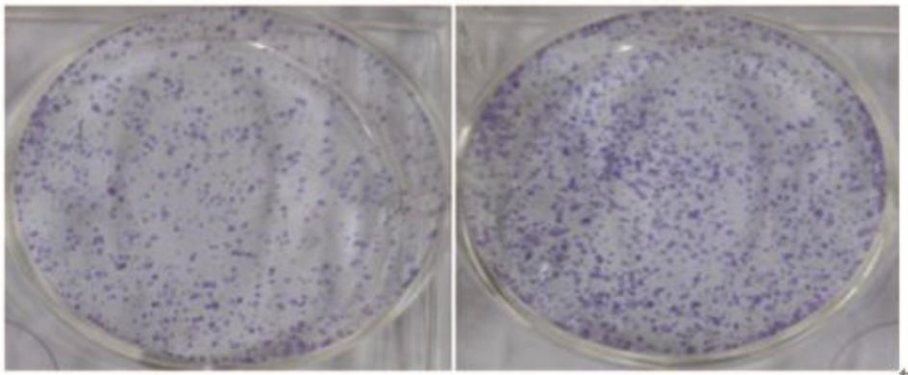

HaCaT<sup>Babe-puro</sup>

HaCaT<sup>pre-miR-365-2</sup>

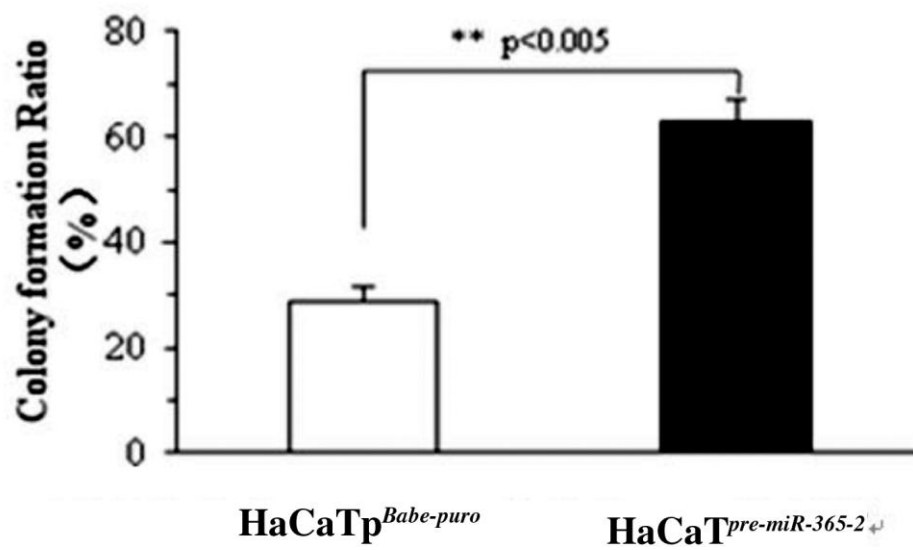

C

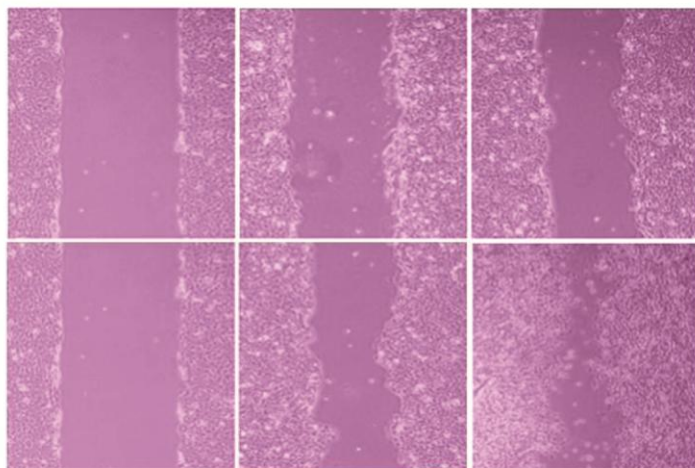

Top: HaCaT<sup>pBabe-puro</sup>; bottom: HaCaT<sup>pre-miR-365-2</sup>

0h

24h

48h
