# Supplementary figures and images for: A novel onco-miR-365 induces cutaneous squamous cell carcinoma
Source: PubMed Central journal article supplement — Carcinogenesis. 2013 Mar 20;34(7):1653–9. doi: 10.1093/carcin/bgt097 (PMC3697891; doi:10.1093/carcin/bgt097), 2013-03-20

A

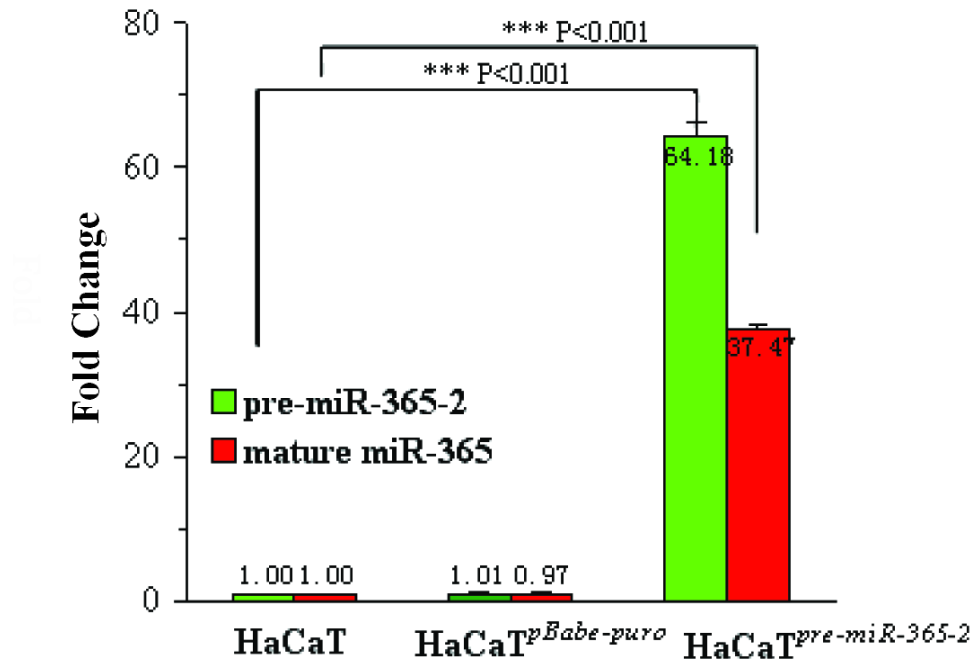

(B)

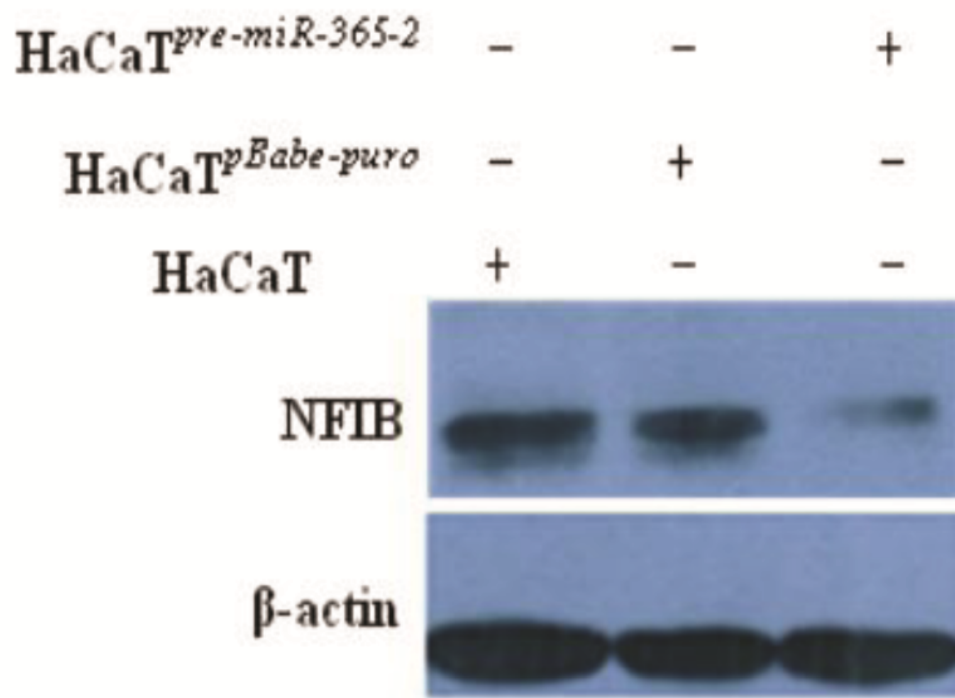

(C)

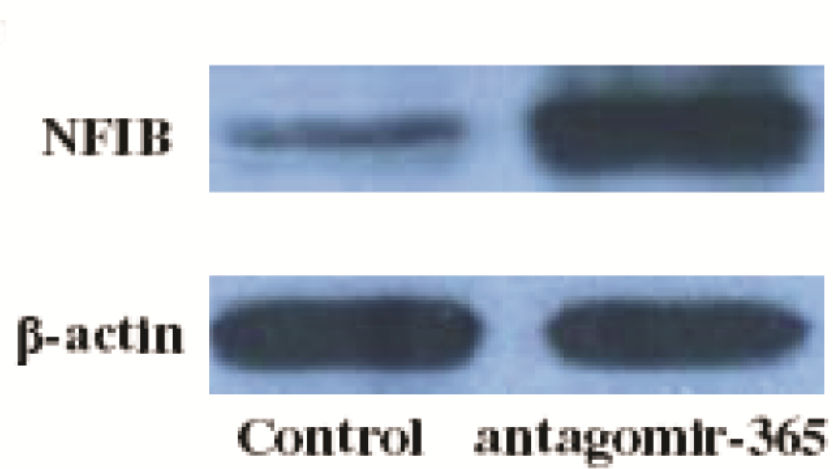

Supplement: supp_bgt097_Supplemental_Figure_2A_C.pdf [file supp_bgt097_Supplemental_Figure_2A_C.pdf]
